# Supplementary material for: Copper-catalyzed thiocarbonylation and thiolation of alkyl iodides
Source: Royal Society of Chemistry journal article supplement (doi:10.1039/d2ob00008c), 2022-01-01
Supplement: d2ob00008c1.pdf [file d2ob00008c1.pdf]

## Supporting Information

*for*

### **Copper–Catalyzed Thiocarbonylation and Thiolation of Alkyl Iodides**

QingqiangTian,<sup>a†</sup>RongjingSun,<sup>a†</sup> and Yahui Li\*<sup>a</sup>

[a]Department Key Laboratory of Agri-Food Safety of Anhui Province, School of Resources and environment, Anhui Agricultural University, Hefei 230036, China.

# Content

|                                                            |     |
|------------------------------------------------------------|-----|
| 1. General Information.....                                | S3  |
| 2. General Procedure of Carbonylative Thiomethylation..... | S3  |
| 3. General Procedure of Thiomethylation.....               | S3  |
| 4. General Procedure of Thioacetylation.....               | S4  |
| 5. Characterization Data for Products.....                 | S4  |
| 6. Reference.....                                          | S9  |
| 7. NMR Spectra.....                                        | S10 |

## 1. General Information

Most of the chemicals were purchased from Aladdin, TCI, Alfa Aesar, Energy-Chemical and used as such unless stated otherwise. Solvents (anhydrous and under inert atmosphere) were collected from the solvent purification system by MBRAUN and used under standard Schlenk technique. NMR spectra were recorded on Bruker Avance 600 and Bruker ARX 400 spectrometers. Chemical shifts (ppm) are given relative to solvent: references for  $\text{CDCl}_3$  were 7.26 ppm ( $^1\text{H}$  NMR) and 77.00 ppm ( $^{13}\text{C}$  NMR). Multiplets were assigned as s (singlet), d (doublet), t (triplet), q (quartet), p (pentet), dd (doublet of doublet), m (multiplet), and br. s (broad singlet). GC-yields were calculated using dodecane as internal standard. All measurements were carried out at room temperature unless otherwise stated. GC-MS analysis was performed on a Shimadzu 2010 instrument and Rtx-5 capillary column. High resolution mass spectra (HRMS) were recorded on Agilent 6210. The data are given as mass units per charge (m/z). Gas chromatography analysis was performed on a Shimadzu 2010 instrument with an FID detector and Rtx-5 capillary column. The products were isolated from the reaction mixture by column chromatography on silica gel 60, 0.063–0.2 mm, 70–230 mesh (Merck). The alkyl iodides and 3-methylthio-tert-butyl propionate derivatives were all synthesized as described previously.

## 2. General Procedure of Carbonylative Thiomethylation (3a - 3p)



A 4 mL screw-cap vial was charged with IPrCuCl (4.8 mg, 5.0 mol%), Salcomine (3.25 mg, 5 mol%), DCC (2.0 mg, 5.0 mol%), **1** (0.2 mmol, 1.0 equiv.), **2** (0.6 mmol, 3.0 equiv.), Xylene (2.0 mL), KO<sup>t</sup>Bu (67.2 mg, 3.0 equiv.) and an oven-dried stirring bar. The vial was closed by a Teflon septum and a phenolic cap and connected to the atmosphere through a needle. Then the vial was fixed in an alloy plate and put into Kemi series autoclave (300 mL). At room temperature, the autoclave was flushed with 30 bar carbon monoxide. The autoclave was placed on a heating plate equipped with magnetic stirring and an aluminum block. The reaction was heated at 80 °C for 20 h. Afterward, the autoclave was cooled to room temperature and the pressure was carefully released. After removal of solvent under reduced pressure, pure product was obtained by column chromatography on silica gel (eluent: PE/EA = 500–30:1).

## 3. General Procedure of Thiomethylation (5a - 5t)



A 25 mL tube was charged with IPrCuCl (4.87 mg, 5.0 mol%), NaO<sup>t</sup>Bu (76.8 mg, 4.0 equiv.) and an

oven-dried stirring bar. Under N<sub>2</sub> was added **1** (0.2 mmol, 1.0 equiv.), **4** (0.6 mmol, 3.0 equiv.) and xylene (2.0 mL). The reaction is allowed to be heated under 140 °C for 24 h. Afterward, the reaction is cooled to room temperature. After removal of solvent under reduced pressure, pure product was obtained by column chromatography on silica gel (eluent: PE/EA = 500-30:1).

#### 4. General Procedure of Thioacetylation (7a - 7d)



A 25 mL tube was charged with IPrCuCl (4.87 mg, 5.0 mol%), Cs<sub>2</sub>CO<sub>3</sub> (260.8 mg, 4.0 equiv.) and an oven-dried stirring bar. Under N<sub>2</sub> was added **1** (0.2 mmol, 1.0 equiv.), **6** (0.6 mmol, 3.0 equiv.) and xylene (2.0 mL). The reaction is allowed to be heated under 140 °C for 24 h. Afterward, the reaction is cooled to room temperature. After removal of solvent under reduced pressure, pure product was obtained by column chromatography on silica gel (eluent: PE/EA = 500-30:1).

#### 5. Characterization Data for Products

**S-Methyl 1,4-dioxaspiro[4.5]decane-8-carbothioate (3b).** Purified by column chromatography (PE). Yield = 29.81 mg (69%). Colorless liquid, <sup>1</sup>H NMR (600 MHz, Chloroform-*d*) δ 3.91 (d, *J* = 1.9 Hz, 4H), 2.49 (t, *J* = 10.5 Hz, 1H), 2.24 (d, *J* = 2.0 Hz, 3H), 1.91 (d, *J* = 12.6 Hz, 2H), 1.84 – 1.75 (m, 4H), 1.53 (dt, *J* = 15.5, 8.1 Hz, 2H). <sup>13</sup>C NMR (151 MHz, Chloroform-*d*) δ 202.34, 107.80, 64.25, 50.71, 33.77, 26.86, 11.18. GC-MS (EI, 70ev) *m/z*(%) = 216 (M<sup>+</sup>, 3), 169 (3), 141 (15), 99 (100), 86 (35), 55 (25). HRMS (ESI) calcd for C<sub>10</sub>H<sub>16</sub>O<sub>3</sub>SNa [M+Na]<sup>+</sup>: 239.0712, found 239.0713.

**S-Methyl 4-(tert-butyl)cyclohexane-1-carbothioate (3c).** Purified by column chromatography (PE). Yield = 19.0 mg (57%). Colorless liquid, <sup>1</sup>H NMR (600 MHz, Chloroform-*d*) δ 2.43-2.37 (m, 1H), 2.25 (s, 3H), 1.99 (d, *J* = 3.33 Hz 2H), 1.88 – 1.80 (m, 2H), 1.43 (m, 2H), 1.05 – 0.96 (m, 3H), 0.83 (s, 9H). <sup>13</sup>C NMR (151 MHz, Chloroform-*d*) δ 203.60, 52.81, 47.23, 32.36, 30.02, 27.42, 26.54, 11.17. GC-MS (EI, 70ev) *m/z*(%) = 167 (M<sup>+</sup>, 30), 139 (15), 123 (8), 83 (50), 57 (100). HRMS (ESI) calcd for C<sub>12</sub>H<sub>22</sub>OSNa [M+Na]<sup>+</sup>: 237.1284, found 237.1278.

**S-Methyl 4-(4-(2,2-difluoroethoxy)phenyl)-2-methylbutane-thioate (3d).** Purified by column chromatography (PE). Yield = 26.5 mg (46%). Colorless liquid, <sup>1</sup>H NMR (600 MHz, Chloroform-*d*) δ 7.11 (t, *J* = 7.7 Hz, 2H), 6.92 – 6.66 (m, 2H), 6.06 (t, *J* = 60.00 Hz, 1H), 4.18 – 4.12 (m, 2H), 2.66 (h, *J* = 7.0 Hz, 1H), 2.56 (q, *J* = 7.6 Hz, 2H), 2.36 – 2.18 (m, 3H), 2.07-1.99 (m, 1H), 1.71-1.64 (m, 1H), 1.20 (t, *J* = 6.9 Hz, 3H). <sup>13</sup>C NMR (151 MHz, Chloroform-*d*) δ 203.84, 156.05, 135.05, 129.46, 114.63, 113.73 (*J* = 241.6 Hz), 67.49, 47.81, 35.82, 32.38, 17.82, 11.31. <sup>19</sup>F NMR (564 MHz, Chloroform-*d*) δ = -125.25, -125.35. GC-MS (EI, 70ev) *m/z* (%) = 288 (M<sup>+</sup>, 10), 241 (126), 184 (24), 171 (100), 104 (45), 77 (12). HRMS (ESI) calcd for C<sub>14</sub>H<sub>18</sub>O<sub>2</sub>F<sub>2</sub>SNa [M+Na]<sup>+</sup>: 311.0889, found 311.0880.

**S-Methyl 4-(4-ethoxyphenyl)-2-methylbutanethioate (3e).** Purified by column chromatography (PE). Yield = 28.2 mg (56%). Colorless liquid, <sup>1</sup>H NMR (600 MHz, Chloroform-*d*) δ 7.07 (d, *J* = 8.6 Hz, 2H), 6.80 (d, *J* = 8.6 Hz, 2H), 4.00 (q, *J* = 6.9 Hz, 2H), 2.67 (q, *J* = 7.0 Hz, 1H), 2.57 – 2.52 (m, 2H), 2.29 (d, 3H), 2.06 – 2.00

(m,1H), 1.71 – 1.63 (m, 1H), 1.39 (t,  $J = 7.0$  Hz, 3H), 1.19 (d,  $J = 7.0$  Hz, 3H).  $^{13}\text{C}$  NMR (151 MHz, Chloroform- $d$ )  $\delta$  203.99, 157.19, 133.44, 129.23, 114.39, 63.38, 47.83, 35.93, 32.39, 17.81, 14.86, 11.34. GC-MS (EI, 70ev)  $m/z(\%) = 252$  ( $\text{M}^+$ , 30), 205 (30), 148 (96), 120 (22), 107 (100), 77 (20).

***S*-Methyl 4-(3-chlorophenyl)-2-methylbutanethioate (3f)**. Purified by column chromatography (PE). Yield = 34.4 mg (71%). Colorless liquid,  $^1\text{H}$  NMR (600 MHz, Chloroform- $d$ )  $\delta$  7.19 (t,  $J = 7.5$  Hz, 1H), 7.17 – 7.14 (m, 2H), 7.05 (d,  $J = 7.2$  Hz, 1H), 2.71 – 2.61 (m, 1H), 2.63 – 2.56 (m, 2H), 2.30 (s, 3H), 2.10 – 1.99 (m, 1H), 1.74 – 1.64 (m, 1H), 1.21 (d,  $J = 7.0$  Hz, 3H).  $^{13}\text{C}$  NMR (151 MHz, Chloroform- $d$ )  $\delta$  203.66, 143.54, 134.12, 129.58, 128.50, 126.55, 126.14, 47.80, 35.39, 32.99, 17.88, 11.35. GC-MS (EI, 70ev)  $m/z(\%) = 242$  ( $\text{M}^+$ , 4), 195 (14), 125 (100), 104 (30).

***S*-methyl 4-(3,4-dichlorophenoxy)-2-methylbutanethioate (3g)**. Purified by column chromatography (PE). Yield = 33.8 mg (55%). Colorless liquid,  $^1\text{H}$  NMR (600 MHz, Chloroform- $d$ )  $\delta$  7.29 (d,  $J = 8.8$  Hz, 1H), 6.96 (s, 1H), 6.72 (d,  $J = 8.8$  Hz, 1H), 3.95 – 3.86 (m, 2H), 2.71 (q,  $J = 7.0$  Hz, 1H), 2.28 (d,  $J = 1.8$  Hz, 3H), 1.85 (dt,  $J = 15.5, 7.4$  Hz, 1H), 1.81 – 1.74 (m, 2H), 1.60 (dt,  $J = 13.9, 7.5$  Hz, 1H), 1.21 (dd,  $J = 6.6, 1.9$  Hz, 3H).  $^{13}\text{C}$  NMR (151 MHz, Chloroform- $d$ )  $\delta$  203.70, 157.99, 132.78, 130.58, 123.85, 116.34, 114.53, 68.19, 48.05, 30.43, 26.67, 17.83, 11.29. GC-MS (EI, 70ev)  $m/z(\%) = 306$  ( $\text{M}^+$ , 2), 175 (10), 145 (55), 69 (100). HRMS (ESI) calcd for  $\text{C}_{13}\text{H}_{16}\text{O}_2\text{Cl}_2\text{SNa}$  [ $\text{M}+\text{Na}$ ] $^+$ : 329.0140, found 329.0140.

***S*-Methyl 4-(4-isopropoxyphenyl)-2-methylbutanethioate (3h)**. Purified by column chromatography (PE). Yield = 29.8 mg (56%). Colorless liquid,  $^1\text{H}$  NMR (600 MHz, Chloroform- $d$ )  $\delta$  7.06 (dt,  $J = 7.9, 3.8$  Hz, 2H), 6.80 (m, 2H), 4.74 – 4.33 (m, 1H), 2.69 – 2.66 (m, 1H), 2.56 – 2.53 (m, 2H), 2.29 (d,  $J = 3.4$  Hz, 3H), 2.06 – 2.00 (m, 1H), 1.71 1.64 (m, 1H), 1.32 – 1.30 (m, 6H), 1.20 – 1.18 (m, 3H).  $^{13}\text{C}$  NMR (151 MHz, Chloroform- $d$ )  $\delta$  203.95, 156.13, 133.45, 129.24, 115.91, 69.92, 47.86, 35.90, 32.39, 22.08, 17.79, 11.31. GC-MS (EI, 70ev)  $m/z(\%) = 266$  ( $\text{M}^+$ , 16), 177 (18), 162 (20), 120 (32), 107 (100), 77 (13). HRMS (ESI) calcd for  $\text{C}_{15}\text{H}_{22}\text{O}_2\text{SNa}$  [ $\text{M}+\text{Na}$ ] $^+$ : 289.1233, found 289.1231.

***S*-Methyl 4-(4-butoxyphenyl)-2-methylbutanethioate (3i)**. Purified by column chromatography (PE). Yield = 29.7 mg (53%). Colorless liquid,  $^1\text{H}$  NMR (600 MHz, Chloroform- $d$ )  $\delta$  7.07 (d,  $J = 8.1$  Hz, 2H), 6.81 (d,  $J = 8.1$  Hz, 2H), 3.93 (t,  $J = 6.5$  Hz, 2H), 2.67 (q,  $J = 7.0$  Hz, 1H), 2.55 (t,  $J = 7.7$  Hz, 2H), 2.29 (s, 3H), 2.04 (dq,  $J = 14.9, 7.5$  Hz, 1H), 1.75 (dt,  $J = 14.1, 6.5$  Hz, 2H), 1.68 (dt,  $J = 13.7, 6.5$  Hz, 1H), 1.52 – 1.45 (m, 2H), 1.20 (d,  $J = 6.4$  Hz, 3H), 0.97 (t,  $J = 7.2$  Hz, 3H).  $^{13}\text{C}$  NMR (151 MHz, Chloroform- $d$ )  $\delta$  203.86, 157.45, 133.37, 129.19, 114.46, 67.71, 47.84, 35.92, 32.39, 31.38, 19.23, 17.76, 13.78, 11.28. GC-MS (EI, 70ev)  $m/z(\%) = 280$  ( $\text{M}^+$ , 18), 233 (18), 176 (55), 120 (35), 107 (100), 77 (12). HRMS (ESI) calcd for  $\text{C}_{16}\text{H}_{24}\text{O}_2\text{SNa}$  [ $\text{M}+\text{Na}$ ] $^+$ : 303.1389, found 303.1381.

***S*-Methyl cyclododecanecarbothioate (3j)**. Purified by column chromatography (PE). Yield = 24.7 mg (51%). Colorless liquid,  $^1\text{H}$  NMR (600 MHz, Chloroform- $d$ )  $\delta$  2.72 – 2.66 (m, 1H), 2.24 (s, 3H), 1.65 – 1.55 (m, 4H), 1.33 (dd,  $J = 24.4, 10.1$  Hz, 18H).  $^{13}\text{C}$  NMR (151 MHz, Chloroform- $d$ )  $\delta$  203.72, 49.44, 27.49, 23.73, 23.62, 23.52, 23.30, 22.55, 11.30. GC-MS (EI, 70ev)  $m/z(\%) = 242$  ( $\text{M}^+$ , 1), 195 (45), 167 (8), 111 (60), 97 (100), 83 (65), 55 (75). HRMS (ESI) calcd for  $\text{C}_{14}\text{H}_{26}\text{OSNa}$  [ $\text{M}+\text{Na}$ ] $^+$ : 265.1597, found 265.1596.

***S*-Methyl 2-methyl dodecanethioate (3k)**. Purified by column chromatography (PE). Yield = 24.8 mg (63%). Colorless liquid,  $^1\text{H}$  NMR (600 MHz, Chloroform- $d$ )  $\delta$  2.66 – 2.59 (m, 1H), 2.27 (s, 3H), 1.72 – 1.66 (m, 1H), 1.39 (m, 1H), 1.24 (d,  $J = 6.8$  Hz, 16H), 1.15 (d,  $J = 6.9$  Hz, 3H), 0.86 (t,  $J = 7.0$  Hz, 3H).  $^{13}\text{C}$  NMR (151 MHz, Chloroform- $d$ )  $\delta$  204.21, 48.51, 34.14, 31.86, 29.54, 29.50, 29.40, 29.27, 27.11, 22.63, 17.63, 14.03, 11.24. GC-MS (EI, 70ev)  $m/z(\%) = 197$  ( $\text{M}^+$ , 30), 169 (7), 113 (14), 99 (18), 71 (70), 57 (100). HRMS (ESI) calcd for  $\text{C}_{14}\text{H}_{28}\text{OSNa}$  [ $\text{M}+\text{Na}$ ] $^+$ : 267.1753, found 267.1758.

***S*-Methyl 2-methyl decanethioate (3l)**. Purified by column chromatography (PE). Yield = 20.9 mg (52%).

Colorless liquid,  $^1\text{H}$  NMR (600 MHz, Chloroform-*d*)  $\delta$  2.64 (q,  $J$  = 6.9 Hz, 1H), 2.28 (s, 3H), 1.73 – 1.67 (m, 1H), 1.42 – 1.38 (m, 1H), 1.26 (d,  $J$  = 5.9 Hz, 12H), 1.16 (d,  $J$  = 6.9 Hz, 3H), 0.88 (t,  $J$  = 7.0 Hz, 3H).  $^{13}\text{C}$  NMR (151 MHz, Chloroform-*d*)  $\delta$  204.15, 48.50, 34.12, 31.79, 29.49, 29.34, 29.17, 27.09, 22.58, 17.60, 13.99, 11.21. GC-MS (EI, 70ev)  $m/z$  (%) = 201 ( $\text{M}^+$ , 4), 169 (35), 99 (16), 85 (70), 57 (100). HRMS (ESI) calcd for  $\text{C}_{12}\text{H}_{24}\text{OSNa}$  [ $\text{M}+\text{Na}$ ] $^+$ : 239.1440, found 239.1488.

***S*-Phenethyl cyclohexanecarbothioate (3m)**. Purified by column chromatography (PE). Yield = 34.2 mg (69%). Colorless liquid,  $^1\text{H}$  NMR (600 MHz, Chloroform-*d*)  $\delta$  = 7.29 (s, 2H), 7.22 (s, 3H), 3.10 (d,  $J$  = 7.3, 2H), 2.85 (s, 2H), 2.47 (t,  $J$  = 11.2, 1H), 1.91 (d,  $J$  = 11.7, 2H), 1.78 (d,  $J$  = 9.6, 2H), 1.67 (s, 2H), 1.46 (d,  $J$  = 11.9, 2H), 1.27 (d,  $J$  = 11.7, 2H).  $^{13}\text{C}$  NMR (151 MHz, Chloroform-*d*)  $\delta$  = 202.78, 140.10, 128.56, 128.39, 126.39, 52.71, 35.96, 29.79, 29.51, 25.62, 25.48. GC-MS (EI, 70ev)  $m/z$ (%) = 248 ( $\text{M}^+$ , 10), 135 (4), 111 (25), 104 (80), 83 (100), 55 (40) HRMS (ESI) calcd for  $\text{C}_{15}\text{H}_{21}\text{OSH}$  [ $\text{M}+\text{H}$ ] $^+$ : 249.1308, found 249.1304.

**Methyl(4-(*p*-tolyl)butan-2-yl)sulfane (5a)**<sup>1</sup>. Purified by column chromatography (PE). Yield = 31 mg (80%). Colorless liquid,  $^1\text{H}$  NMR (600 MHz, Chloroform-*d*)  $\delta$  7.10 (d,  $J$  = 4.9 Hz, 4H), 2.75 – 2.69 (m, 2H), 2.66 (p,  $J$  = 6.8 Hz, 1H), 2.33 (d,  $J$  = 4.8 Hz, 3H), 2.07 (d,  $J$  = 4.9 Hz, 3H), 1.87 (m,  $J$  = 13.6, 8.9, 6.7 Hz, 1H), 1.77 (m, 1H), 1.31 (d,  $J$  = 6.7 Hz, 3H).  $^{13}\text{C}$  NMR (151 MHz, Chloroform-*d*)  $\delta$  138.81, 135.19, 128.99, 128.22, 40.52, 38.09, 32.73, 20.91, 20.77, 12.79. GC-MS (EI, 70ev)  $m/z$ (%) = 194 ( $\text{M}^+$ , 21), 146 (38), 131 (100), 105 (60), 75 (20).

**Methyl(5-phenoxypentan-2-yl)sulfane (5b)**<sup>1</sup>. Purified by column chromatography (PE). Yield = 35 mg (83%). Colorless liquid,  $^1\text{H}$  NMR (600 MHz, Chloroform-*d*)  $\delta$  7.29 -7.26 (m, 2H), 6.93 (t,  $J$  = 7.3 Hz, 1H), 6.89 (d,  $J$  = 7.8 Hz, 2H), 3.99 – 3.96 (m, 2H), 2.73 (h,  $J$  = 6.8 Hz, 1H), 2.08 (s, 3H), 1.96 – 1.84 (m, 2H), 1.78 – 1.62 (m, 2H), 1.31 (d,  $J$  = 6.7 Hz, 3H).  $^{13}\text{C}$  NMR (151 MHz, Chloroform-*d*)  $\delta$  158.98, 129.37, 120.55, 114.49, 67.56, 40.93, 32.75, 26.80, 20.82, 12.93. GC-MS (EI, 70ev)  $m/z$  (%) = 210 ( $\text{M}^+$ , 5), 117 (100), 94 (12), 69 (65), 61 (41).

**(4-(4-Ethoxyphenyl)butan-2-yl)(methyl)sulfane (5c)**<sup>1</sup>. Purified by column chromatography (PE). Yield = 33mg (74%). Colorless liquid,  $^1\text{H}$  NMR (600 MHz, Chloroform-*d*)  $\delta$  7.15 – 7.05 (m, 2H), 6.85 – 6.76 (m, 2H), 4.01 (q,  $J$  = 7.0 Hz, 2H), 2.77 – 2.55 (m, 3H), 2.06 (s, 3H), 1.88 – 1.82 (m, 1H), 1.77 – 1.71 (m, 1H), 1.39 (t,  $J$  = 7.0 Hz, 3H), 1.30 (d,  $J$  = 6.8 Hz, 3H).  $^{13}\text{C}$  NMR (151 MHz, Chloroform-*d*)  $\delta$  157.13, 133.85, 129.21, 114.43, 63.40, 40.47, 38.22, 32.29, 20.80, 14.86, 12.81. GC-MS (EI, 70ev)  $m/z$ (%) = 224 ( $\text{M}^+$ , 44), 176 (71), 161 (40), 133 (78), 107 (100), 89 (38), 77 (34), 61 (12).

**Methyl(4-(4-(trifluoromethoxy)phenyl)butan-2-yl)sulfane(5d)**. Purified by column chromatography (PE). Yield = 34.8 mg (66%). Colorless liquid,  $^1\text{H}$  NMR (600 MHz, Chloroform-*d*)  $\delta$  7.23 – 7.17 (m, 2H), 7.12 (d,  $J$  = 8.1 Hz, 2H), 2.75 (t,  $J$  = 7.9 Hz, 2H), 2.64 (h,  $J$  = 6.8 Hz, 1H), 2.06 (s, 3H), 1.89 – 1.82 (m, 1H), 1.80 -1.74 (m, 1H), 1.31 (d,  $J$  = 6.7 Hz, 3H).  $^{13}\text{C}$  NMR (151 MHz, Chloroform-*d*)  $\delta$  147.41, 140.65, 129.56, 120.87, 120.49 (d,  $J$  = 128.3 Hz), 40.43, 37.85, 32.49, 20.82, 12.74. GC-MS (EI, 70ev)  $m/z$ (%) = 264 ( $\text{M}^+$ , 40), 216 (80), 201 (100), 175 (70), 135 (12), 131 (45), 109 (30), 75 (60), 61 (14).  $^{19}\text{F}$  NMR (564 MHz, Chloroform-*d*)  $\delta$  = -57.98. HRMS (ESI) calcd for  $\text{C}_{12}\text{H}_{15}\text{OF}_3\text{SNa}$  [ $\text{M}+\text{Na}$ ] $^+$ : 287.0688, found 287.0687.

**(4-(4-Fluorophenyl)butan-2-yl)(methyl)sulfane (5e)**. Purified by column chromatography (PE). Yield = 34 mg (86%). Colorless liquid,  $^1\text{H}$  NMR (600 MHz, Chloroform-*d*)  $\delta$  7.15 - 7.13 (m, 2H), 6.95 (t,  $J$  = 8.7 Hz, 2H), 2.71 (t,  $J$  = 7.9 Hz, 2H), 2.63 (h,  $J$  = 6.8 Hz, 1H), 2.06 (s, 3H), 1.87 – 1.81 (m, 1H), 1.78 – 1.69 (m, 1H), 1.30 (d,  $J$  = 6.8 Hz, 3H).  $^{13}\text{C}$  NMR (151 MHz, Chloroform-*d*)  $\delta$  161.24 (d,  $J$  = 244.6 Hz), 137.48 (d,  $J$  = 3.0 Hz), 129.66 (d,  $J$  = 7.5 Hz), 115.04 (d,  $J$  = 19.6 Hz), 40.42, 38.08, 32.36, 20.82, 12.79. GC-MS (EI, 70ev)  $m/z$  (%) = 198 ( $\text{M}^+$ , 30), 150 (58), 135 (100), 109 (92), 75 (27).  $^{19}\text{F}$  NMR (564 MHz, Chloroform-*d*)  $\delta$  = -117.79. HRMS (ESI) calcd for  $\text{C}_{11}\text{H}_{16}\text{FS}$  [ $\text{M}+\text{H}$ ] $^+$ : 199.0951, found 199.0943.

**(4-(3-Chlorophenyl)butan-2-yl)(methyl)sulfane (5f)**<sup>1</sup>. Purified by column chromatography (PE). Yield = 36 mg (84%). Colorless liquid, <sup>1</sup>H NMR (600 MHz, Chloroform-*d*) δ 7.19 (d, *J* = 7.9 Hz, 2H), 7.17 – 7.13 (m, 1H), 7.07 (d, *J* = 7.4 Hz, 1H), 2.72 (t, *J* = 8.0 Hz, 2H), 2.64 (h, *J* = 6.8 Hz, 1H), 2.06 (s, 3H), 1.90 – 1.80 (m, 1H), 1.80 – 1.74 (m, 1H), 1.34 – 1.27 (m, 3H). <sup>13</sup>C NMR (151 MHz, Chloroform-*d*) δ 143.98, 134.11, 129.55, 128.50, 126.57, 126.00, 40.44, 37.68, 32.87, 20.83, 12.77. GC-MS (EI, 70ev) *m/z*(%) = 214 (M<sup>+</sup>, 25), 166 (32), 151 (15), 131 (100), 89 (32), 75 (46).

**Methyl(4-(3-(methylthio)butyl)phenyl)sulfane (5g)**<sup>1</sup>. Purified by column chromatography (PE). Yield = 28 mg (62%). Colorless liquid, <sup>1</sup>H NMR (600 MHz, Chloroform-*d*) δ 7.23 – 7.16 (m, 2H), 7.15 – 7.07 (m, 2H), 2.72 – 2.69 (m, 2H), 2.64 (h, *J* = 6.8 Hz, 1H), 2.46 (s, 3H), 2.06 (s, 3H), 1.88 – 1.82 (m, 1H), 1.79 – 1.68 (m, 1H), 1.30 (d, *J* = 6.8 Hz, 3H). <sup>13</sup>C NMR (151 MHz, Chloroform-*d*) δ 139.08, 135.32, 128.92, 127.24, 40.45, 37.92, 32.64, 20.81, 16.35, 12.80. GC-MS (EI, 70ev) *m/z*(%) = 226 (M<sup>+</sup>, 87), 178 (96), 137 (88), 131 (100), 89 (38), 75 (28), 61 (12).

**Methyl(4-(naphthalen-2-yl)butan-2-yl)sulfane (5h)**. Purified by column chromatography (PE). Yield = 41 mg (90%). Colorless liquid, <sup>1</sup>H NMR (600 MHz, Chloroform-*d*) δ 7.88 – 7.75 (m, 3H), 7.65 (s, 1H), 7.48 – 7.42 (m, 2H), 7.36 (m, 1H), 2.93 (m, 2H), 2.71 (h, *J* = 6.8 Hz, 1H), 2.09 (s, 3H), 2.03 – 1.91 (m, 1H), 1.92 – 1.86 (m, 1H), 1.36 (d, *J* = 6.9 Hz, 3H). <sup>13</sup>C NMR (151 MHz, Chloroform-*d*) δ 139.42, 133.62, 131.99, 127.89, 127.56, 127.36, 127.24, 126.39, 125.88, 125.11, 40.55, 37.84, 33.34, 20.86, 12.85. GC-MS (EI, 70ev) *m/z*(%) = 230 (M<sup>+</sup>, 70), 182 (60), 167 (100), 142 (90), 115 (60), 89 (30), 75 (40), 61 (11). HRMS (ESI) calcd for C<sub>15</sub>H<sub>18</sub>SNa [M+Na]<sup>+</sup>: 253.1021, found 253.1016.

**Methyl(4-phenylbutan-2-yl)sulfane (5i)**<sup>1</sup>. Purified by column chromatography (PE). Yield = 27 mg (75%). Colorless liquid, <sup>1</sup>H NMR (600 MHz, Chloroform-*d*) δ 7.28 (t, *J* = 7.5 Hz, 2H), 7.21 – 7.17 (m, 3H), 2.75 (t, *J* = 7.6 Hz, 2H), 2.67 (h, *J* = 6.8 Hz, 1H), 2.07 (s, 3H), 1.93 – 1.83 (m, 1H), 1.82 – 1.74 (m, 1H), 1.32 (d, *J* = 6.8 Hz, 3H). <sup>13</sup>C NMR (151 MHz, Chloroform-*d*) δ 141.93, 128.37, 128.32, 125.77, 40.55, 37.99, 33.21, 20.80, 12.81. GC-MS (EI, 70ev) *m/z*(%) = 180 (M<sup>+</sup>, 30), 132 (50), 117 (100), 91 (75), 75 (25).

**Dodecan-2-yl(methyl)sulfane (5j)**<sup>1</sup>. Purified by column chromatography (PE). Yield = 35.4 mg (82%). Colorless liquid, <sup>1</sup>H NMR (600 MHz, Chloroform-*d*) δ 2.63 (h, *J* = 6.7 Hz, 1H), 2.05 (s, 3H), 1.54 (q, *J* = 6.7 Hz, 1H), 1.45 – 1.41 (m, 1H), 1.37 (t, *J* = 7.0 Hz, 2H), 1.26 (q, *J* = 5.9 Hz, 17H), 0.87 (t, *J* = 7.0 Hz, 3H). <sup>13</sup>C NMR (151 MHz, Chloroform-*d*) δ 41.24, 36.45, 31.85, 29.56, 29.51, 29.26, 27.03, 22.61, 20.68, 14.01, 13.02. GC-MS (EI, 70ev) *m/z*(%) = 216 (M<sup>+</sup>, 17), 210 (7), 168 (4), 111 (10), 97 (18), 75 (100), 57 (40).

**Methyl(tridecan-2-yl)sulfane (5k)**<sup>1</sup>. Purified by column chromatography (PE). Yield = 34 mg (75%). Colorless liquid, <sup>1</sup>H NMR (600 MHz, Chloroform-*d*) δ 2.62 (q, *J* = 6.7 Hz, 1H), 2.04 (s, 3H), 1.57 – 1.52 (m, 1H), 1.43 (m, 1H), 1.37 (d, *J* = 6.1 Hz, 2H), 1.28 – 1.22 (m, 19H), 0.86 (t, *J* = 7.0 Hz, 3H). <sup>13</sup>C NMR (151 MHz, Chloroform-*d*) δ 41.24, 36.46, 31.87, 29.61, 29.57, 29.52, 29.29, 27.04, 22.62, 20.70, 14.02, 13.02. GC-MS (EI, 70ev) *m/z*(%) = 230 (M<sup>+</sup>, 20), 215 (10), 182 (5), 111 (10), 97 (20), 95 (100), 55 (40).

**Methyl(3-phenylpropyl)sulfane (5l)**<sup>1</sup>. Purified by column chromatography (PE). Yield = 25 mg (75%). Colorless liquid, <sup>1</sup>H NMR (600 MHz, Chloroform-*d*) δ 7.32 – 7.26 (m, 2H), 7.23 – 7.13 (m, 3H), 2.73 (t, *J* = 7.6 Hz, 2H), 2.51 (t, *J* = 7.3 Hz, 2H), 2.10 (s, 3H), 1.93 (p, *J* = 7.3 Hz, 2H). <sup>13</sup>C NMR (151 MHz, Chloroform-*d*) δ 141.57, 128.43, 128.33, 125.85, 34.73, 33.62, 30.64, 15.41. GC-MS (EI, 70ev) *m/z*(%) = 166 (M<sup>+</sup>, 42), 117 (100), 91 (45), 75 (24), 61 (15).

**(2,6-Dichlorophenethyl)(methyl)sulfane (5m)**<sup>1</sup>. Purified by column chromatography (PE). Yield = 30 mg (68%). Colorless liquid, <sup>1</sup>H NMR (600 MHz, Chloroform-*d*) δ 7.27 – 7.26 (m, 2H), 7.15 – 7.02 (m, 1H), 3.26 – 3.16 (m, 2H), 2.75 – 2.65 (m, 2H), 2.21 (d, *J* = 0.9 Hz, 3H). <sup>13</sup>C NMR (151 MHz, Chloroform-*d*) δ 136.24, 135.40, 128.20, 128.03, 31.86, 31.49, 15.50. GC-MS (EI, 70ev) *m/z*(%) = 220 (M<sup>+</sup>, 5), 185 (75), 170 (8), 101

(8), 75 (6), 61 (100).

**Dodecyl(methyl)sulfane (5n)**<sup>2</sup>. Purified by column chromatography (PE). Yield = 41.2 mg (95%). Colorless liquid, <sup>1</sup>H NMR (600 MHz, Chloroform-*d*) δ 2.46 (t, *J* = 7.5 Hz, 2H), 2.07 (s, 3H), 1.56 (p, *J* = 7.5 Hz, 2H), 1.34 (q, *J* = 7.2 Hz, 2H), 1.24 (s, 16H), 0.86 (t, *J* = 7.0 Hz, 3H). <sup>13</sup>C NMR (151 MHz, Chloroform-*d*) δ 34.31, 31.86, 29.60, 29.58, 29.55, 29.49, 29.29, 29.21, 29.18, 28.80, 22.62, 15.47, 14.02. GC-MS (EI, 70ev) *m/z* (%) = 216 (M<sup>+</sup>, 50), 201 (100), 111 (15), 97 (40), 69 (70), 55 (90).

**Methyl(octadecyl)sulfane (5o)**<sup>3</sup>. Purified by column chromatography (PE). Yield = 58 mg (97%). Colorless liquid, <sup>1</sup>H NMR (600 MHz, Chloroform-*d*) δ 2.51 – 2.42 (m, 2H), 2.07 (s, 3H), 1.57 (t, *J* = 7.6 Hz, 2H), 1.38 – 1.33 (m, 2H), 1.28 – 1.24 (m, 28H), 0.86 (t, *J* = 7.0 Hz, 3H). <sup>13</sup>C NMR (151 MHz, Chloroform-*d*) δ 34.31, 31.89, 29.65, 29.63, 29.61, 29.57, 29.50, 29.31, 29.23, 29.19, 28.81, 22.64, 15.47, 14.03. GC-MS (EI, 70ev) *m/z* (%) = 300 (M<sup>+</sup>, 32), 285 (100), 111 (17), 97 (35), 69 (45), 55 (60).

**1,8-Bis(methylthio)octane (5p)**<sup>4</sup>. Purified by column chromatography (PE). Yield = 38.4 mg (93%). Colorless liquid, <sup>1</sup>H NMR (600 MHz, Chloroform-*d*) δ 2.45 (t, *J* = 7.4 Hz, 4H), 2.06 (d, *J* = 1.2 Hz, 6H), 1.56 (p, *J* = 7.4 Hz, 4H), 1.37 – 1.32 (m, 4H), 1.30 – 1.26 (m, 4H). <sup>13</sup>C NMR (151 MHz, Chloroform-*d*) δ 34.26, 29.11, 29.07, 28.69, 15.49. GC-MS (EI, 70ev) *m/z*(%) = 206 (M<sup>+</sup>, 40), 159 (30), 143 (35), 110 (20), 87 (14), 69 (50), 61 (100).

**Benzyl(cyclohexyl)sulfane (5q)**<sup>5</sup>. Purified by column chromatography (PE). Yield = 22 mg (54%). Colorless liquid, <sup>1</sup>H NMR (600 MHz, Chloroform-*d*) δ 7.33 – 7.27 (m, 4H), 7.24 – 7.19 (m, 1H), 3.74 (s, 2H), 2.56 (tt, *J* = 10.6, 3.7 Hz, 1H), 1.96 – 1.92 (m, 2H), 1.75 – 1.73 (m, 2H), 1.40 – 1.30 (m, 2H), 1.30 – 1.14 (m, 4H). <sup>13</sup>C NMR (151 MHz, Chloroform-*d*) δ 138.94, 128.70, 128.38, 126.71, 42.96, 34.60, 33.37, 25.95, 25.85. GC-MS (EI, 70ev) *m/z* (%) = 206 (M<sup>+</sup>, 25), 115 (20), 91 (100), 81 (16), 55 (22).

**Cyclohexyl(phenethyl)sulfane (5r)**<sup>6</sup>. Purified by column chromatography (PE). Yield = 32mg (73%). Colorless liquid, <sup>1</sup>H NMR (600 MHz, Chloroform-*d*) δ 7.29 (t, *J* = 7.6 Hz, 2H), 7.24 – 7.17 (m, 3H), 2.89 – 2.86 (m, 2H), 2.80 – 2.72 (m, 2H), 2.67 – 2.63 (m, 1H), 2.04 – 1.90 (m, 2H), 1.78 – 1.76 (m, 2H), 1.62 – 1.60 (m, 1H), 1.38 – 1.20 (m, 5H). <sup>13</sup>C NMR (151 MHz, Chloroform-*d*) δ 140.84, 128.40, 126.22, 43.69, 36.73, 33.70, 31.64, 26.11, 25.84. GC-MS (EI, 70ev) *m/z*(%) = 220 (M<sup>+</sup>, 45), 129 (90), 104 (90), 81 (100), 55 (70).

**Cyclohexyl(*p*-tolyl)sulfane (5s)**<sup>7</sup>. Purified by column chromatography (PE). Yield = 30 mg (73%). Colorless liquid, <sup>1</sup>H NMR (600 MHz, Chloroform-*d*) δ 7.36 – 7.28 (m, 2H), 7.09 (d, *J* = 7.8 Hz, 2H), 3.01 (tt, *J* = 10.5, 3.7 Hz, 1H), 2.32 (s, 3H), 1.96 (m, 2H), 1.75 (m, 2H), 1.39 – 1.19 (m, 6H). <sup>13</sup>C NMR (151 MHz, Chloroform-*d*) δ 136.80, 132.75, 131.22, 129.45, 47.09, 33.37, 26.05, 25.76, 21.01. GC-MS (EI, 70ev) *m/z*(%) = 206 (M<sup>+</sup>, 25), 124 (100), 91 (35), 55 (22).

**Cyclohexyl(4-methoxyphenyl)sulfane (5t)**<sup>8</sup>. Purified by column chromatography (PE). Yield = 29 mg (65%). Colorless liquid, <sup>1</sup>H NMR (600 MHz, Chloroform-*d*) δ 7.44 – 7.32 (m, 2H), 6.88 – 6.77 (m, 2H), 3.79 (s, 3H), 2.97 – 2.81 (m, 1H), 1.93 – 1.91 (m, 2H), 1.78 – 1.69 (m, 2H), 1.42 – 1.07 (m, 6H). <sup>13</sup>C NMR (151 MHz, Chloroform-*d*) δ 159.29, 135.51, 114.26, 55.25, 47.89, 33.36, 26.08, 25.76. GC-MS (EI, 70ev) *m/z* (%) = 222 (M<sup>+</sup>, 30), 140 (100), 125 (25), 55 (22).

***S*-(4-Phenylbutan-2-yl) ethanethioate (7a)**<sup>9</sup>. Purified by column chromatography (PE). Yield = 16.6 mg (40%). Colorless liquid, <sup>1</sup>H NMR (400 MHz, Chloroform-*d*) δ 7.30 – 7.25 (m, 2H), 7.22 – 7.15 (m, 3H), 3.59 (h, *J* = 7.0 Hz, 1H), 2.76 – 2.62 (m, 2H), 2.33 (s, 3H), 1.92 – 1.81 (m, 2H), 1.34 (d, *J* = 6.9 Hz, 3H). <sup>13</sup>C NMR (101 MHz, Chloroform-*d*) δ 195.90, 141.52, 128.42, 128.37, 125.96, 39.28, 38.26, 33.37, 30.84, 21.45. GC-MS (EI, 70ev) *m/z* (%) = 208 (M<sup>+</sup>, 5), 134 (70), 117 (85), 91 (100), 65 (25), 61 (35).

***S*-(3-(4-Bromophenyl)propyl) ethanethioate (7b)**<sup>10</sup>. Purified by column chromatography (PE). Yield = 28 mg (51%). <sup>1</sup>H NMR (600 MHz, Chloroform-*d*) δ 7.38 (d, *J* = 8.5 Hz, 2H), 7.03 (d, *J* = 7.7 Hz, 2H), 2.85 (t, *J* = 7.3

Hz, 2H), 2.62 (t,  $J = 7.7$  Hz, 2H), 2.32 (s, 3H), 1.90 – 1.82 (m, 2H).  $^{13}\text{C}$  NMR (151 MHz, Chloroform- $d$ )  $\delta$  195.53, 140.04, 131.43, 130.13, 119.74, 34.18, 30.90, 30.56, 28.39. GC-MS (EI, 70ev)  $m/z$  (%) = 274 ( $M^+$ , 35), 196 (80), 117 (100), 90 (75).

**S-Phenethyl ethanethioate (7c)**<sup>11</sup>. Purified by column chromatography (PE). Yield = 25 mg (69%).  $^1\text{H}$  NMR (600 MHz, Chloroform- $d$ )  $\delta$  7.30 (t,  $J = 7.6$  Hz, 2H), 7.22 (t,  $J = 6.7$  Hz, 3H), 3.15 – 3.09 (m, 2H), 2.87 (t,  $J = 7.7$  Hz, 2H), 2.33 (s, 3H).  $^{13}\text{C}$  NMR (151 MHz, Chloroform- $d$ )  $\delta$  195.52, 139.93, 128.41, 126.43, 35.74, 30.56, 30.45. GC-MS (EI, 70ev)  $m/z$  (%) = 180 ( $M^+$ , 3), 104 (100).

**S-(4-Phenylbutyl) ethanethioate (7d)**<sup>12</sup>. Purified by column chromatography (PE). Yield = 29 mg (70%).  $^1\text{H}$  NMR (600 MHz, Chloroform- $d$ )  $\delta$  7.27 (t,  $J = 7.5$  Hz, 2H), 7.17 (t,  $J = 8.7$  Hz, 3H), 2.89 (t,  $J = 7.2$  Hz, 2H), 2.62 (t,  $J = 7.6$  Hz, 2H), 2.32 (s, 3H), 1.70 (p,  $J = 8.2, 7.6$  Hz, 2H), 1.61 (p,  $J = 7.2$  Hz, 2H).  $^{13}\text{C}$  NMR (151 MHz, Chloroform- $d$ )  $\delta$  195.74, 142.01, 128.33, 128.28, 125.75, 35.34, 30.55, 30.43, 29.09, 28.91. GC-MS (EI, 70ev)  $m/z$  (%) = 208 ( $M^+$ , 25), 165 (25), 131 (55), 91 (100).

## 6. Reference

- (1) Tian, Q. Q.; Wang, L. L.; Li, Y. H. Copper-catalyzed direct thioetherification of Alkyl Halides with S-Alkyl Butanethioate as Thiol transfer reagent. *Journal of Sulfur Chemistry*, **2021**, DOI: 10.1080/17415993.2021.1967354.
- (2) Bai, S.; Gao, Y.; Jiang, C.; Liu, X.; Qi, X.; Wang, J.; Qing, C.; Yang, C. Visible-light-induced nickel-catalyzed cross-coupling with alkylzirconocenes from unactivated alkenes. *Chem*, **2020**, *6*, 675–688.
- (3) Patra, P. K.; Nishide, K.; Fuji, K.; Node, M. Dod-s-me and methyl 6-morpholinohexyl sulfide (mms) as new odorless borane carriers. *Synthesis*, **2004**, *7*, 1003–1006.
- (4) Yamamoto, T.; Hayakawa, T.; Yoshino, M.; Hata, S-I.; Hirayama, Y. An efficient oxidation of long chain alkyl methyl sulfides to sulfoxides. *Org. Prep. Proced. Int*, **2000**, *32*, 192–196.
- (5) The University of Wales Swansea. EP 866049, **1998**, A2.
- (6) Zhao, G.; Kaur, S.; Wang, T. Visible-light-mediated thiol-ene reactions through organic photoredox catalysis. *Org. Lett*, **2017**, *19*, 3291–3294.
- (7) Bastug, G.; Nolan, S. P. Carbon-sulfur bond formation catalyzed by [Pd(IPr\*OMe)(cin)Cl] (cin = cinnamyl). *J. Org. Chem*, **2013**, *78*, 9303–9308.
- (8) Wang, L.; Zhou, W-Y.; Chen, S-C.; He, M-Y.; Chen, Q. A. Highly efficient palladium-catalyzed one-pot synthesis of unsymmetrical aryl alkyl thioethers under mild conditions in water. *Adv. Synth. Catal*, **2012**, *354*, 839–845.
- (9) Epifanov, M.; Mo, J. Y.; Dubois, R.; Yu, H.; Sammis, G. M. One-pot deoxygenation and substitution of alcohols mediated by sulfuryl fluoride. *J. Org. Chem.*, **2021**, *86*, 3768–3777.
- (10) Schüpbach, B.; Terfort, A. A divergent synthesis of oligoarylalkanethiols with Lewis-basic N-donor termini. *Org. Biomol. Chem.*, **2010**, *8*, 3552–3562.
- (11) Tyson, E. L.; Ament, M. S.; Yoon, T. P. Transition metal photoredox catalysis of radical thiol-ene reactions. *J. Org. Chem.*, **2013**, *78*, 2046–2050.
- (12) Levin, V. V.; Dilman, A. D. Visible-light-mediated organocatalyzed thiol-ene reaction initiated by a proton-coupled electron transfer. *J. Org. Chem.*, **2019**, *84*, 8337–8343.

## 7. NMR Spectra



<sup>1</sup>H NMR of compound 3b (600 MHz, CDCl<sub>3</sub>)



<sup>13</sup>C {<sup>1</sup>H} NMR of compound 3b (151 MHz, CDCl<sub>3</sub>)



<sup>1</sup>H NMR of compound 3c(600 MHz, CDCl<sub>3</sub>)



<sup>13</sup>C {<sup>1</sup>H} NMR of compound 3c (151 MHz, CDCl<sub>3</sub>)



<sup>1</sup>H NMR of compound 3d (600 MHz, CDCl<sub>3</sub>)



<sup>13</sup>C {<sup>1</sup>H} NMR of compound 3d (151 MHz, CDCl<sub>3</sub>)



$^{19}\text{F}$  NMR of compound 3d (654 MHz,  $\text{CDCl}_3$ )



$^1\text{H}$  NMR of compound 3e (600 MHz,  $\text{CDCl}_3$ )



$^{13}\text{C}$   $\{^1\text{H}\}$  NMR of compound 3e (151 MHz,  $\text{CDCl}_3$ )



$^1\text{H}$  NMR of compound 3f (600 MHz,  $\text{CDCl}_3$ )



$^{13}\text{C}$  { $^1\text{H}$ } NMR of compound 3f (151 MHz,  $\text{CDCl}_3$ )



$^1\text{H}$  NMR of compound 3g (600 MHz,  $\text{CDCl}_3$ )





$^{13}\text{C} \{^1\text{H}\}$  NMR of compound 3h (151 MHz,  $\text{CDCl}_3$ )



$^1\text{H}$  NMR of compound 3i (600 MHz,  $\text{CDCl}_3$ )



$^{13}\text{C}$   $\{^1\text{H}\}$  NMR of compound 3i (151 MHz,  $\text{CDCl}_3$ )



$^1\text{H}$  NMR of compound 3j (600 MHz,  $\text{CDCl}_3$ )



$^{13}\text{C}$   $\{^1\text{H}\}$  NMR of compound 3j (151 MHz,  $\text{CDCl}_3$ )



$^1\text{H}$  NMR of compound 3k (600 MHz,  $\text{CDCl}_3$ )



$^{13}\text{C}$   $\{^1\text{H}\}$  NMR of compound 3k (151 MHz,  $\text{CDCl}_3$ )



$^1\text{H}$  NMR of compound 3l (600 MHz,  $\text{CDCl}_3$ )



$^{13}\text{C}$   $\{^1\text{H}\}$  NMR of compound 31 (151 MHz,  $\text{CDCl}_3$ )



$^1\text{H}$  NMR of compound 3m (151 MHz,  $\text{CDCl}_3$ )



$^{13}\text{C}$   $\{^1\text{H}\}$  NMR of compound 3m (151 MHz,  $\text{CDCl}_3$ )



$^1\text{H}$  NMR of compound 5a (600 MHz,  $\text{CDCl}_3$ )



$^{13}\text{C}$  { $^1\text{H}$ } NMR of compound 5a (151 MHz,  $\text{CDCl}_3$ )



$^1\text{H}$  NMR of compound 5b (600 MHz,  $\text{CDCl}_3$ )



$^{13}\text{C}$  { $^1\text{H}$ } NMR of compound 5b (151 MHz,  $\text{CDCl}_3$ )



$^1\text{H}$  NMR of compound 5c (600 MHz,  $\text{CDCl}_3$ )



$^{13}\text{C}$  { $^1\text{H}$ } NMR of compound 5c (151 MHz,  $\text{CDCl}_3$ )



$^1\text{H}$  NMR of compound 5d (600 MHz,  $\text{CDCl}_3$ )



$^{13}\text{C}$  { $^1\text{H}$ } NMR of compound 5d (151 MHz,  $\text{CDCl}_3$ )



$^{19}\text{F}$  NMR of compound 5d (564 MHz,  $\text{CDCl}_3$ )



$^1\text{H}$  NMR of compound 5e (600 MHz,  $\text{CDCl}_3$ )



$^{13}\text{C}$   $\{^1\text{H}\}$  NMR of compound 5e (151 MHz,  $\text{CDCl}_3$ )



$^{19}\text{F}$  NMR of compound 5e (564 MHz,  $\text{CDCl}_3$ )



$^1\text{H}$  NMR of compound 5f (600 MHz,  $\text{CDCl}_3$ )





$^{13}\text{C}$  { $^1\text{H}$ } NMR of compound 5g (151 MHz,  $\text{CDCl}_3$ )



$^1\text{H}$  NMR of compound 5h (600 MHz,  $\text{CDCl}_3$ )



$^{13}\text{C}$  { $^1\text{H}$ } NMR of compound 5h (151 MHz,  $\text{CDCl}_3$ )



$^1\text{H}$  NMR of compound 5i (600 MHz,  $\text{CDCl}_3$ )





$^{13}\text{C}$  { $^1\text{H}$ } NMR of compound 5j (151 MHz,  $\text{CDCl}_3$ )



$^1\text{H}$  NMR of compound 5k (600 MHz,  $\text{CDCl}_3$ )



$^{13}\text{C}$  { $^1\text{H}$ } NMR of compound 5k (151 MHz,  $\text{CDCl}_3$ )



$^1\text{H}$  NMR of compound 5l (600 MHz,  $\text{CDCl}_3$ )



$^{13}\text{C}$   $\{^1\text{H}\}$  NMR of compound 51 (151 MHz,  $\text{CDCl}_3$ )



$^1\text{H}$  NMR of compound 5m (600 MHz,  $\text{CDCl}_3$ )



$^{13}\text{C}$   $\{^1\text{H}\}$  NMR of compound 5m (151 MHz,  $\text{CDCl}_3$ )



$^1\text{H}$  NMR of compound 5n (600 MHz,  $\text{CDCl}_3$ )



$^{13}\text{C} \{^1\text{H}\}$  NMR of compound 5n (151 MHz,  $\text{CDCl}_3$ )



$^1\text{H}$  NMR of compound 5o (600 MHz,  $\text{CDCl}_3$ )



$^{13}\text{C} \{^1\text{H}\}$  NMR of compound 5o (151 MHz,  $\text{CDCl}_3$ )



$^1\text{H}$  NMR of compound 5p (600 MHz,  $\text{CDCl}_3$ )









$^{13}\text{C}$  { $^1\text{H}$ } NMR of compound 5s (151 MHz,  $\text{CDCl}_3$ )



$^1\text{H}$  NMR of compound 5t (600 MHz,  $\text{CDCl}_3$ )



$^{13}\text{C}$  { $^1\text{H}$ } NMR of compound 5t (151 MHz,  $\text{CDCl}_3$ )







$^{13}\text{C}$   $\{^1\text{H}\}$  NMR of compound 7b (151 MHz,  $\text{CDCl}_3$ )



$^1\text{H}$  NMR of compound 7c (600 MHz,  $\text{CDCl}_3$ )



<sup>13</sup>C {<sup>1</sup>H} NMR of compound 7c (151 MHz, CDCl<sub>3</sub>)



<sup>1</sup>H NMR of compound 7d (600 MHz, CDCl<sub>3</sub>)



<sup>13</sup>C {<sup>1</sup>H} NMR of compound 7d (151 MHz, CDCl<sub>3</sub>)
